# Supplementary material for: Preventing lead leakage in perovskite solar cells and modules with a low-cost and stable chemisorption coating
Source: Royal Society of Chemistry journal article supplement (doi:10.1039/d4mh00033a), 2024-01-01
Supplement: d4mh00033a1.pdf [file d4mh00033a1.pdf]

## Supporting Information

Please note: this updated document was made available on 18<sup>th</sup> June 2024, to correct an error in Fig. 6b.

### **Preventing lead leakage in perovskite solar cells and modules with a low-cost and stable chemisorption coating**

Zongxu Zhang<sup>a,b</sup>, Yating Shi<sup>a,b</sup>, Jiujiang Chen<sup>c</sup>, Peng Shen<sup>d</sup>, Hongshi Li<sup>d</sup>, Mengjin Yang<sup>c</sup>, Shirong Wang<sup>a,b</sup>, Xianggao Li<sup>a,b</sup>, Fei Zhang<sup>a,b\*</sup>

<sup>a</sup> School of Chemical Engineering and Technology, Tianjin University, Tianjin 300072, China. Email: [fei\\_zhang@tju.edu.cn](mailto:fei_zhang@tju.edu.cn)

<sup>b</sup> Collaborative Innovation Center of Chemical Science and Engineering (Tianjin), Tianjin 300072, China

<sup>c</sup> Zhejiang Engineering Research Center for Energy Optoelectronic Materials and Devices, Ningbo Institute of Materials Technology and Engineering, Chinese Academy of Sciences, Ningbo 315201, China

<sup>d</sup> Institute of New Energy Material Chemistry, School of Materials Science and Engineering, Renewable Energy Conversion and Storage Center, Nankai University, Tianjin 300350, P. R. China



## Experimental Section

### Materials

All solvents and chemicals were purchased from commercial suppliers and used as received without further purification. 4-tert-butyl pyridine (tBP, > 96%), lithium salt-bis(trifluoromethane)sulfonimide imide (LiTFSI), 2,2',7,7'-tetrakis-(N, N di-p-methoxyphenylamine)-9,9'-spirobifluorene (spiro-OMeTAD, 99.5%), methylammonium iodide (MAI), Bathocuproine (BCP) and fullerene (C<sub>60</sub>) were purchased from Xi'an Polymer Light Technology. SnO<sub>2</sub> colloidal solution (15 wt% in H<sub>2</sub>O) was purchased from Alfa Aesar. Acetonitrile (ACN, 99.8%), N, N-dimethylformamide (DMF, 99.8%), dimethyl sulfoxide (DMSO, 99.8%), isopropanol (IPA), chlorobenzene (CB, 99.9%), [2-(9H-carbazol-9-yl)ethyl]phosphonic acid (2PACz) and Lithium fluoride (LiF) were purchased from Sigma-Aldrich. Lead iodide (PbI<sub>2</sub>, 99.99%), Lead bromide (PbBr<sub>2</sub>, 99.99%), Cesium iodide (CsI, 99.5%) formamidinium iodide (FAI, 99.5%), methylammonium bromide (MABr, 99.5%), fluorine-doped tin oxide (FTO) and indium-doped tin oxide (ITO) were purchased from Yingkou Advanced Election Technology Co., Ltd. Poly(vinyl alcohol) (PVA, alcoholysis:87.0~89.0 mol/mol, viscosity:4.6-5.4) and hydrogen peroxide (30 % in water) were purchased from Aladdin. Polydimethylsiloxane(PDMS, SYLGARD™ 184 Silicone Elastomer Kit) was purchased from Dow Corning. Sulfosuccinic Acid (SSA, 70 wt. % in H<sub>2</sub>O) was purchased from Macklin.

### Preparation of PDMS with SMP coating

SYLGARD™ 184 Silicone Elastomer Kit was used according to instructions and prepared into a 500 μm PDMS substrate through blade-coating. The PVA solution was prepared by dissolving 3g of PVA in 8 ml of deionized water, stirring at 90 °C for 30 minutes. Then, 2mL of SSA was added and stirred for 30 min at 90 °C to obtain the blending solution. The thickness of the scraper was adjusted, and the blending solution was cast onto the PDMS substrate. PDMS with SMP coating was obtained after drying in a Vacuum oven at 45 °C for 24h.

### Device Fabrication

*n-i-p structure:* FTO glass substrates were sequentially cleaned with deionized water, IPA, and ethanol for 15 min, respectively. Then, the glass substrates were dried by N<sub>2</sub>. The cleaned and dry FTO glass substrates were treated with ultraviolet ozone for 10 min and then transferred into an N<sub>2</sub>-filled glovebox before use. Then, the FTO

glass substrates were spin-coated with a thin layer of SnO<sub>2</sub>, diluted in water at a 1:5 ratio at 3,000 rpm for 30 s, followed by annealing at 150 °C for 30 min. The precursor of perovskite (FA<sub>0.65</sub>MA<sub>0.20</sub>Cs<sub>0.15</sub>)Pb(I<sub>0.8</sub>Br<sub>0.2</sub>)<sub>3</sub> film was prepared by dissolving FAI, CsI, MABr, PbI<sub>2</sub>, and PbBr<sub>2</sub> with stoichiometry in anhydrous N, N-dimethylformamide (DMF) and dimethyl sulfoxide (DMSO) mixed solvent (4/1, v/v). Then, 60 μL, 1.5M perovskite precursor was coated on the SnO<sub>2</sub>/FTO substrate at a spin speed of 2,000 rpm for 10 s and 6,000 rpm for 30 s with subsequent annealing for 60 min at 100 °C. Subsequently, the spiro-OMeTAD solutions were prepared by dissolving 90.5 mg of spiro-OMeTAD in 1 mL CB, with the addition of 35.5 μL of tBP and 20.63 μL of LiTFSI (520 mg dissolved in 1 mL of ACN). The solution was spun at 3,000 rpm for 30 s. 80 nm gold was thermally deposited for the top electrode at an evaporation rate of 0.2 ~ 0.8 Å s<sup>-1</sup>.

*p-i-n structure:* ITO glass substrates were sequentially cleaned with deionized water, IPA, and ethanol for 15 min, respectively. Then, the glass substrates were dried by N<sub>2</sub>. The cleaned and dry ITO glass substrates were treated with ultraviolet ozone for 10 min and then transferred into an N<sub>2</sub>-filled glovebox before use. Then, the ITO glass substrates were spin-coated with a thin layer of 2PACz and 4MeO-PACz(3:2 v/v, 0.5mg/mL), diluted in ethanol at 3,000 rpm for 30 s in an N<sub>2</sub> glovebox, followed by annealing at 100 °C for 10 min. The precursor of perovskite FA<sub>0.8</sub>MA<sub>0.15</sub>Cs<sub>0.05</sub>PbI<sub>3</sub> film was prepared by dissolving FAI, CsI, MABr, MAI, and PbI<sub>2</sub> with stoichiometry in anhydrous N, N-dimethylformamide (DMF) and dimethyl sulfoxide (DMSO) mixed solvent (4/1, v/v). Then, 60 μL, 1.5M perovskite precursor was coated on the SAMs/ITO substrate at a spin speed of 1,000 rpm for 10 s and 5,000 rpm for 30 s with subsequent annealing for 45 min at 100 °C to form the perovskite film. Subsequently, 1 nm LiF, 20 nm C<sub>60</sub>, 5 nm BCP, and 100 nm silver were sequentially evaporated to complete the single-junction devices.

### **Module fabrication**

FTO glass substrates (5 cm × 5 cm ) were scribed P1 lines with a femtosecond 1030nm laser scribe, Then FTO was washed with detergent, deionized water, acetone, and isopropanol in sequence for 30 minutes. After that, the cleaned FTO substrate was dried with N<sub>2</sub> gas and then treated with plasma for 5 minutes. The 500μL MeO-2PACz (0.5mg/mL) dissolved in absolute ethanol as a hole transport material was spin-coated on FTO for the 30s at 3000 rpm and then annealed at 100°C for 10 minutes.

Subsequently, 350 $\mu$ L 1.5 M perovskite precursor was deposited on the MeO-2PACz layer. The dispersed perovskite solution was spin-coated with 4000 rpm for 25 s. Nitrogen flow was employed with the assistance of nucleation. After that, the perovskite film was quickly transferred to a hot plate at 100 °C for 30 min annealing. Then, 25 nm C60 at a rate of 0.2  $\text{\AA s}^{-1}$  and 6 nm BCP at a rate of 0.2  $\text{\AA s}^{-1}$  were thermally evaporated, respectively, under high vacuum ( $< 8 \times 10^{-4}$  Pa). P2 was processed parallel to P1 lines using the same laser scribe to expose bottom FTOs. After that, a 100 nm silver electrode at a rate of 2.0  $\text{\AA s}^{-1}$  was thermally evaporated under a high vacuum ( $< 8 \times 10^{-4}$  Pa). Finally, P3 lines were scribed to separate sub-cells. The distance between P1 and P3 was  $\sim 224\mu\text{m}$ , the width of the subcell was 6.4mm, the aperture area of the minimodule was 10.24cm<sup>2</sup>, and GFF was 96.5%.

### **Device encapsulation**

Copper wires are bonded to the electrode through a conductive silver paste to lead out the electrode. Then, tightly adhere the encapsulation layer to both sides of the device and use Kraft K-704B as the edge sealant to encapsulate the device. Subsequently, place the device at room temperature for curing.

### **Characterization**

The concentration of the Pb<sup>2+</sup> aqueous solution was determined using a SHIMADZU AA-7000 atomic absorption spectrophotometer instrument. The transmittance of PDMS with or without SMP was determined using a Techcomp UV2600 UV-Vis spectrophotometer. The infrared spectra were determined using an FTIR-650. Tensile measurement was determined using an MTS CMT6103 Electronic universal testing machine (Executive standards: GB 13022-1991,<sup>1</sup> Sample width: 20 mm). An Analytik Jena Multi C/N 3100 determined the total organic carbon analysis. The thermogravimetric analysis was determined using a HITACHI STA200. XPS spectra were performed using a ThermoFisher Scientific K-Alpha+, Al Ka as the X-ray source, and the binding energy was calibrated with polluted carbon C1s (284.80 as the correction value) under vacuum conditions of  $5 \times 10^{-8}$  Pa.

### ***J-V curves***

*J-V* measurement of the perovskite solar cells was determined using a Keithley 2400 source meter under simulated AM 1.5G illumination with an intensity of 100 mW cm<sup>-2</sup> from a solar simulator in an N<sub>2</sub>-filled glovebox at room temperature. All *J-V* results

are measured by scanning along the reverse and forward scans in the range of -0.1 V to 1.2 V with a step volt of 0.02 V and a delay time of 10 ms. The device area was defined and characterized as 0.09 cm<sup>2</sup> by a metal shadow mask.

### **The adsorption kinetics of Pb<sup>2+</sup>**

In the adsorption experiment, the calculation formulas for the adsorption capacity at any time ( $q_t$ , mg g<sup>-1</sup>) and at equilibrium ( $q_e$ , mg g<sup>-1</sup>) are as follows:

$$q_t = \frac{c_0 - c_t}{M}V$$

$$q_e = \frac{c_0 - c_e}{M}V$$

Where  $C_0$  represents the initial concentration of the lead ion solution (mg L<sup>-1</sup>),  $C_t$  is the concentration of the lead ion solution at any time (mg L<sup>-1</sup>),  $C_e$  is the concentration of the lead ion solution at equilibrium (mg L<sup>-1</sup>),  $M$  is the weight of the adsorbent, and  $V$  is the volume of the lead ion solution.

Adsorption kinetics data will be fitted using pseudo-first-order and pseudo-second-order kinetic models. The equations for these two kinetic models are as follows:

Pseudo-first-order kinetic model:

$$q_t = q_e (1 - e^{-k_1 t})$$

Pseudo-second-order kinetic model:

$$q_t = \frac{k_2 q_e^2 t}{1 + k_2 q_e t}$$

Where it is the adsorption capacity at the time,  $q_e$  is the adsorption capacity at equilibrium,  $k_1$  is the rate constant for pseudo-first-order kinetics,  $k_2$  is the rate constant for pseudo-second-order kinetics, and  $t$  is the time.

### **Computational details**

All calculations were performed using the Gaussian 16 package. The geometry of the investigated structures was optimized using the B3LYP basis set with basis set superposition error (BSSE)<sup>2</sup>.

$$E_{(interaction)} = E_{(AB)} - E_{(A)} - E_{(B)} - E_{(BSSE)}$$

Where  $E_{(AB)}$  is the total energy of A model with B,  $E_{(A)}$  is the energy A, and  $E_{(B)}$  is that for B.  $E_{(BSSE)}$  is the BSSE energy.

### **The estimated cost for SMP coating**

For 400  $\mu\text{m}$  SMP coating, the estimated usage of raw materials is  $\sim 202 \text{ g m}^{-2}$  of PVA and  $\sim 193 \text{ g m}^{-2}$  for SSA. Wholesale prices for large quantities of raw materials: PVA costs \$1.5 per kilogram ( <https://www.100ppi.com/mprice/plist-1-1211-1.html> ), SSA costs \$25 per kilogram ( <https://china.guidechem.com/cas/481405.html> ). Then, the cost can be calculated as approximately  $\$5.13 \text{ m}^{-2}$ . For a more manufacturable p-i-n module configuration, the direct manufacturing cost is  $\$31.7 \text{ m}^{-2}$ .<sup>3</sup> When SMP film is applied to this module, the manufacturing cost increases is 16% higher than that without SMP, and the minimum sustainable price is raised to approximately  $0.24 \text{ \$ W}^{-1}$ , (Without SMP is  $0.21 \text{ \$ W}^{-1}$ ) which is still lower than that of c-Si ( $0.25\text{-}0.27 \text{ \$ W}^{-1}$ ).<sup>4</sup>

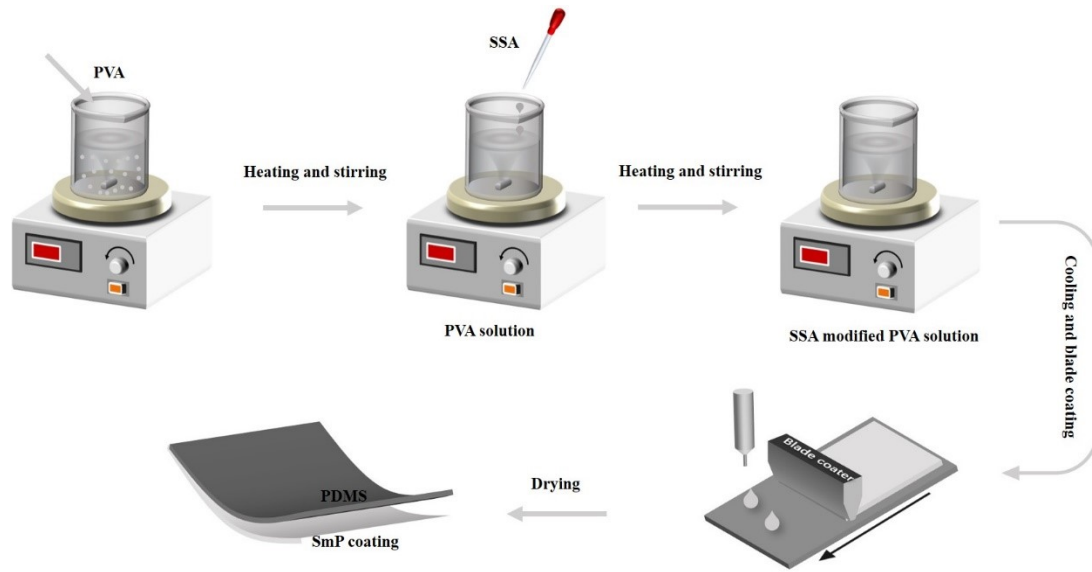

**Fig. S1** Schematic diagram of SMP coating production process.



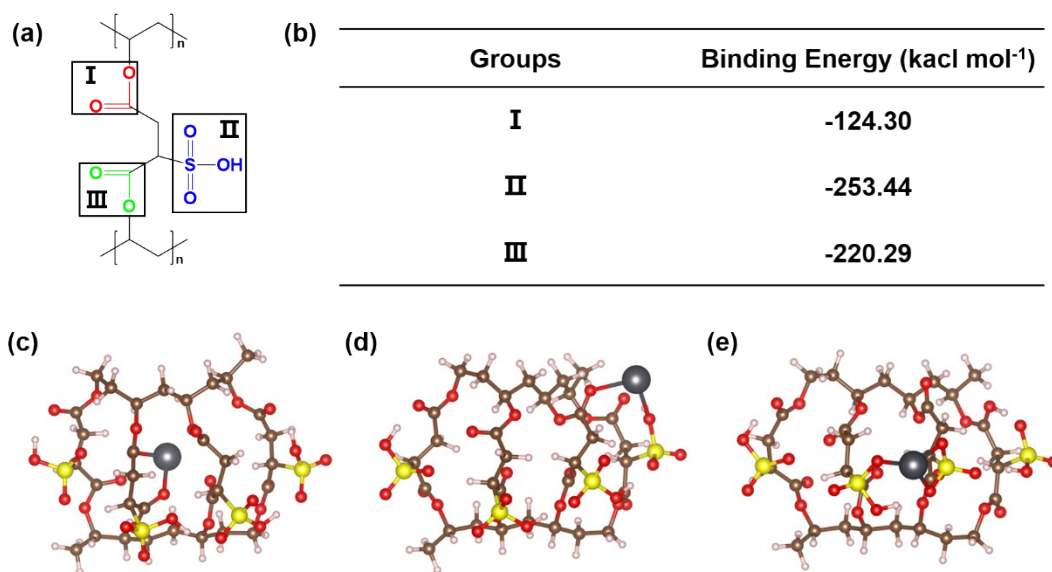

**Fig. S2** (a) Structural formula of SMP. (b) Calculated binding energies ( $E_b$ ) of adsorption of  $Pb^{2+}$  by different functional groups of SMP at 25 °C. Schematic of binding configurations of  $Pb^{2+}$  with different functional groups of SMP ( $n=4$ ). (c) group I (d) group II (e) group III. Configurations were obtained based on density functional theory calculations.

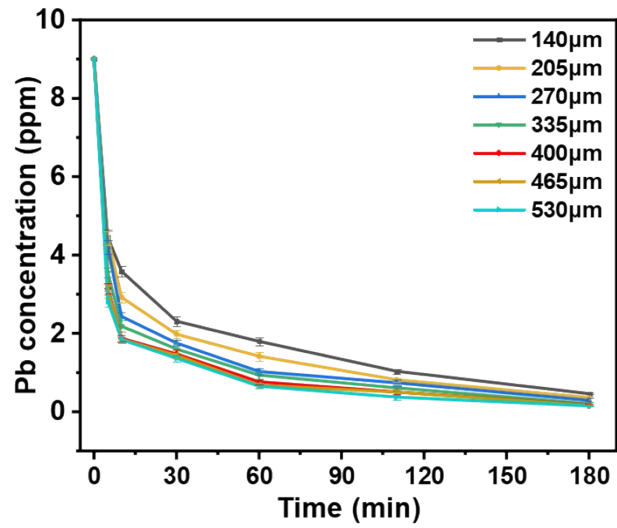

**Fig. S3** The concentration changes of lead ions in the 50 mL water with an initial concentration of 9 ppm when immersing different thicknesses of 6.25 cm<sup>2</sup> SMP in water.

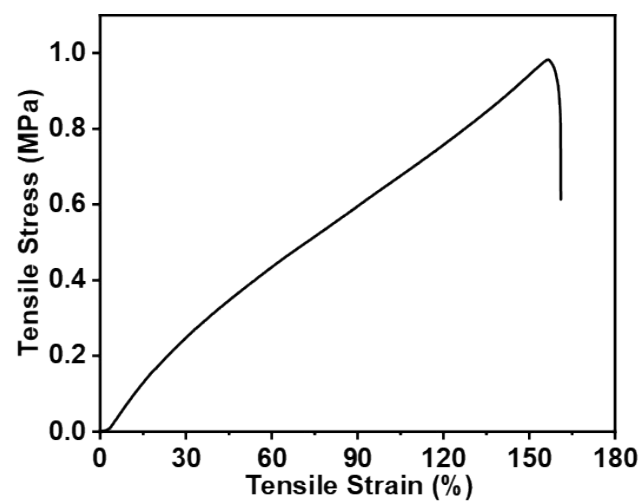

**Fig. S4** Tensile curve of SMP film.

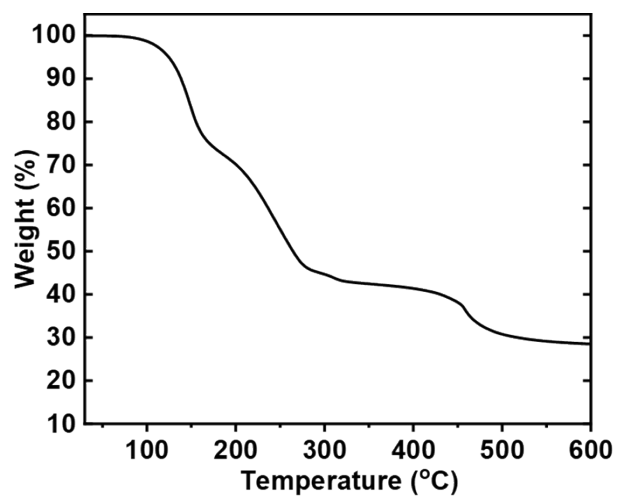

**Fig. S5** TGA curves of SMP with a heating rate of 10 °C min<sup>-1</sup> under nitrogen atmosphere.

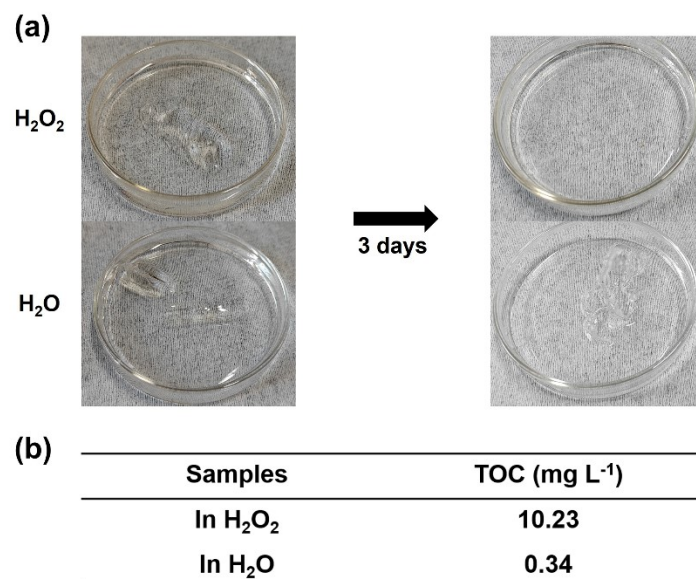

**Fig. S6** (a) Schematic diagram of SMP film degradation (b) the total organic carbon (TOC) results of placing 0.3g SMP in 10 mL H<sub>2</sub>O and 10 mL H<sub>2</sub>O<sub>2</sub> after 3 days.

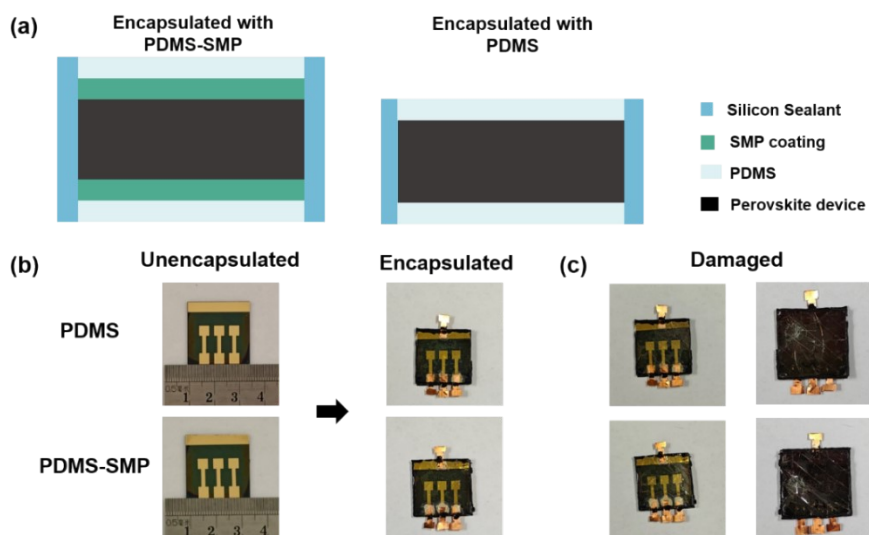

**Fig. S7** (a) Two encapsulation structures with and without SMP coating. (b) Photos of two encapsulation structures in PSC devices before and after encapsulation. (c) Photos of encapsulated devices damaged with a knife and iron ball.

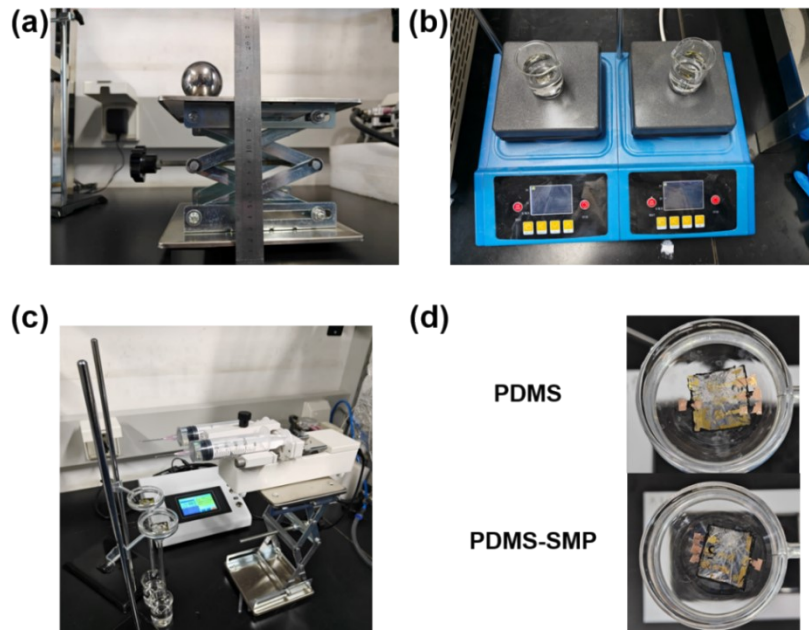

**Fig. S8** Experimental setup diagram. (a) Releasing an iron ball from a vertical distance of 15 centimeters. (b) immersion test, (c) Dropping water test. (d) Photos of PSCs devices with two different encapsulation structures after rain experiment.

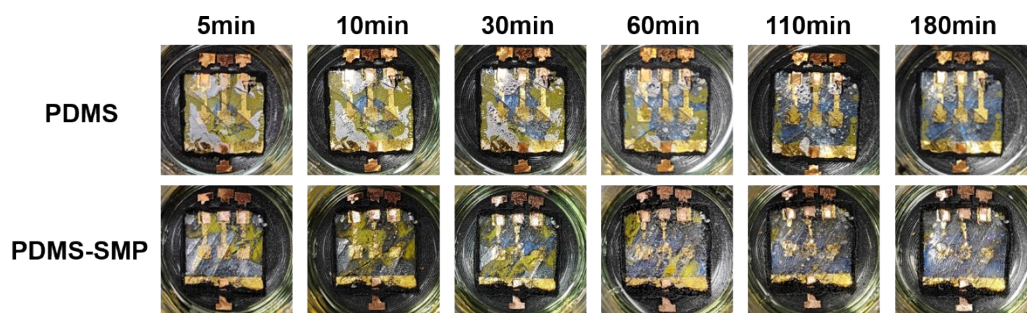

**Fig. S9** Photos of the changes in n-i-p structure devices with two encapsulation structures immersed in deionized water (pH=7, 50 °C) for 180 minutes.



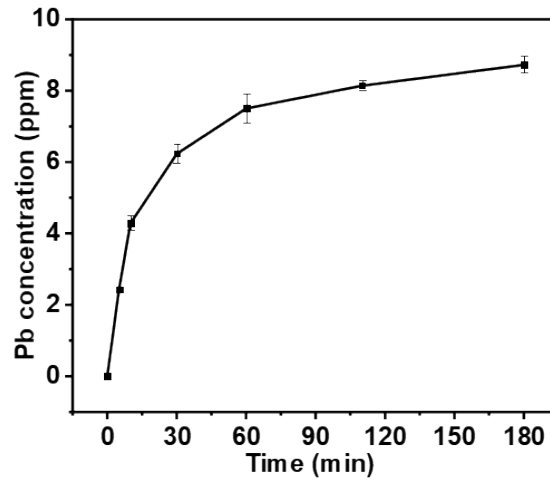

**Fig. S10** The lead leakage from the bare n-i-p devices immersed in deionized water (pH=7, 25 °C) for 180 minutes.

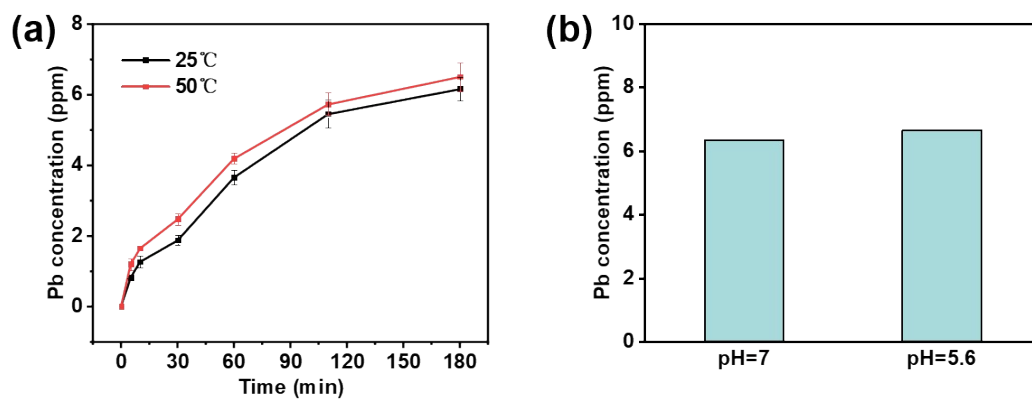

**Fig. S11** Lead leakage of damaged encapsulated n-i-p devices with PDMS-PVA films. (a) Immersed in 50mL of deionized water (pH=7) for 180 minutes. (b) Simulated rainfall experiment with a flow rate of 31.25 mL h<sup>-1</sup> and a duration of 1.5h.

(a)

|      |          |          |          |          |          |           |          |          |          |          |          |          |          |          |
|------|----------|----------|----------|----------|----------|-----------|----------|----------|----------|----------|----------|----------|----------|----------|
| Date | 10/2     | 10/3     | 10/4     | 10/5     | 10/6     | 10/7      | 10/8     | 10/9     | 10/10    | 10/11    | 10/12    | 10/13    | 10/14    | 10/15    |
| Temp | 17°- 26° | 17°- 26° | 17°- 26° | 13°- 25° | 15°- 23° | 15°- 23°  | 14°- 22° | 12°- 22° | 12°- 24° | 14°- 24° | 16°- 23° | 13°- 23° | 12°- 24° | 11°- 23° |
| WX   |          |          |          |          |          |           |          |          |          |          |          |          |          |          |
| Date | 10/16    | 10/17    | 10/18    | 10/19    | 10/21    | 10/21     | 10/22    | 10/23    | 10/24    | 10/25    | 10/26    | 10/27    | 10/28    | 10/29    |
| Temp | 13°- 23° | 15°- 24° | 13°- 22° | 10°- 20° | 9°- 17°  | 11°- 22°  | 11°- 23° | 13°- 24° | 13°- 25° | 14°- 27° | 10°- 21° | 10°- 24° | 13°- 23° | 14°- 23° |
| WX   |          |          |          |          |          |           |          |          |          |          |          |          |          |          |
| Date | 10/29    | 10/30    | 10/31    | 11/1     | 11/2     | 11/3      | 11/4     | 11/5     | 11/6     | 11/7     | 11/8     | 11/9     | 11/10    | 11/11    |
| Temp | 14°- 23° | 14°- 22° | 14°- 21° | 15°- 20° | 11°- 21° | 8°- 15°   | 11°- 19° | 5°- 12°  | 2°- 8°   | 6°- 12°  | 4°- 15°  | 0°- 7°   | 0°- 5°   | -1°- 6°  |
| WX   |          |          |          |          |          |           |          |          |          |          |          |          |          |          |
| Date | 11/12    | 11/13    | 11/14    | 11/15    | 11/16    | 11/17     | 11/18    | 11/19    | 11/20    | 11/21    | 11/22    | 11/23    | 11/24    | 11/25    |
| Temp | -1°- 6°  | 1°- 7°   | °1- 11°  | 4°- 9°   | 0°- 10°  | 0°- 8°    | 2°- 13°  | 3°- 7°   | 4°- 16°  | 5°- 14°  | 2°- 15°  | -3°- 4°  | -4°- 1°  | -2°- 2°  |
| WX   |          |          |          |          |          |           |          |          |          |          |          |          |          |          |
| Date | 11/26    | 11/27    | 11/28    | 11/29    | 11/30    | 12/1      | 12/2     | 12/3     | 12/4     | 12/5     | 12/6     | 12/7     | 12/8     | 12/9     |
| Temp | -2°- 4°  | -2°- 9°  | -2°- 5°  | -3°- 1°  | -3°- 2°  | -2°- 4°   | -1°- 9°  | -1°- 10° | 0°- 10°  | 0°- 11°  | 1°- 14°  | 1°- 13°  | 1°- 13°  | -2°- 7°  |
| WX   |          |          |          |          |          |           |          |          |          |          |          |          |          |          |
| Date | 12/10    | 12/11    | 12/12    | 12/13    | 12/14    | 12/15     |          |          |          |          |          |          |          |          |
| Temp | -2°- 0°  | -3°- -2° | -3- 1°   | -2°- -1° | -6°- -4° | -10°- -4° |          |          |          |          |          |          |          |          |
| WX   |          |          |          |          |          |           |          |          |          |          |          |          |          |          |

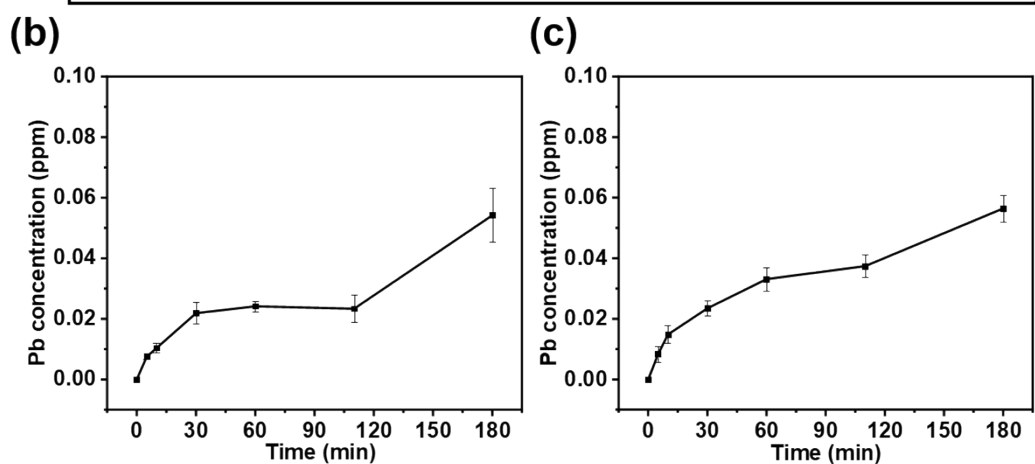

**Fig. S12** (a) The specific weather conditions over the 75 days. (b) The lead leakage from the damaged devices encapsulated with the fresh PDMS-SMP film. (c) The lead leakage from the damaged devices encapsulated with the PDMS-SMP films after a 75-day outdoor exposure.

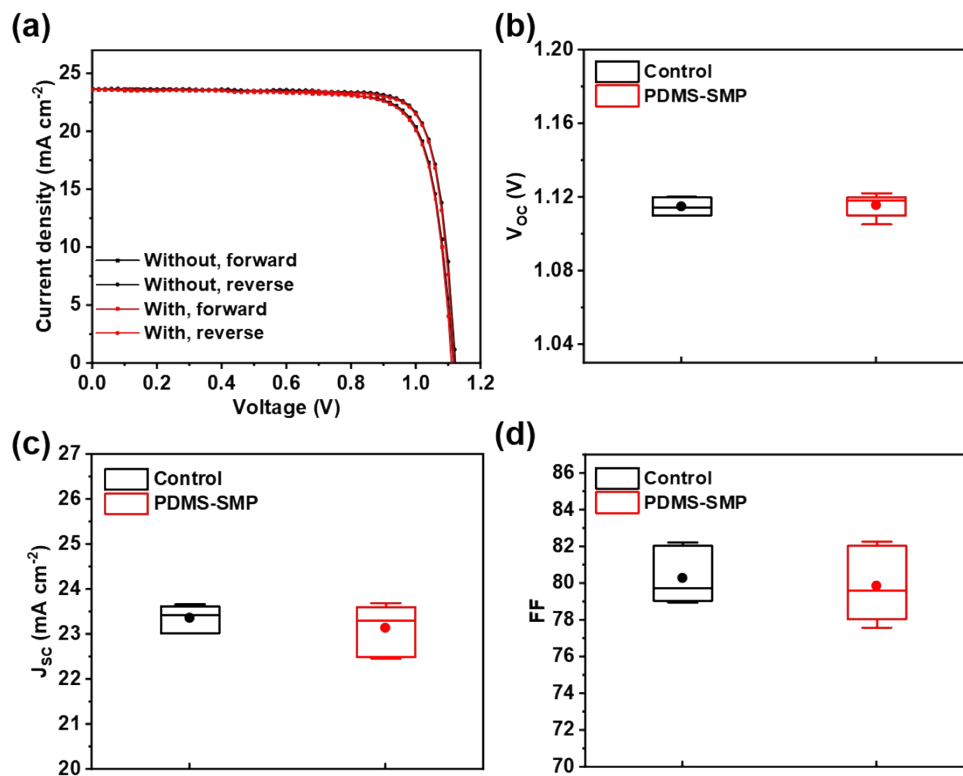

**Fig. S13** (a)  $J-V$  curves of representative n-i-p PSCs devices with and without PDMS-SMP encapsulation. (b)  $V_{oc}$  (c)  $J_{sc}$  (d) FF Changes of corresponding n-i-p structure devices. 6 devices in each.

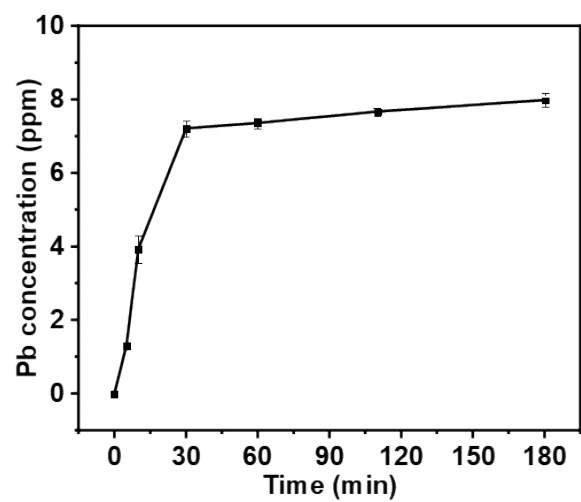

**Fig. S14** The lead leakage from the bare p-i-n devices immersed in deionized water (pH=7, 25 °C) for 180 minutes.

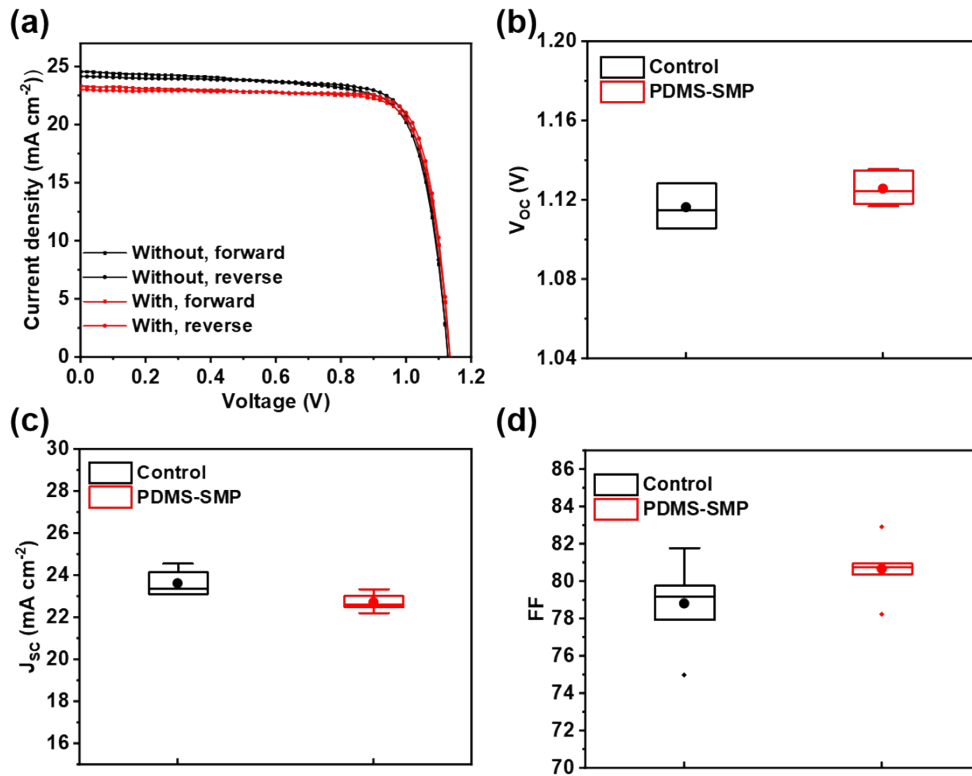

**Fig. S15** (a)  $J-V$  curves of representative p-i-n PSCs devices with and without PDMS-SMP encapsulation. (b)  $V_{oc}$  (c)  $J_{sc}$  (d) FF Changes of corresponding p-i-n structure devices. 6 devices in each.

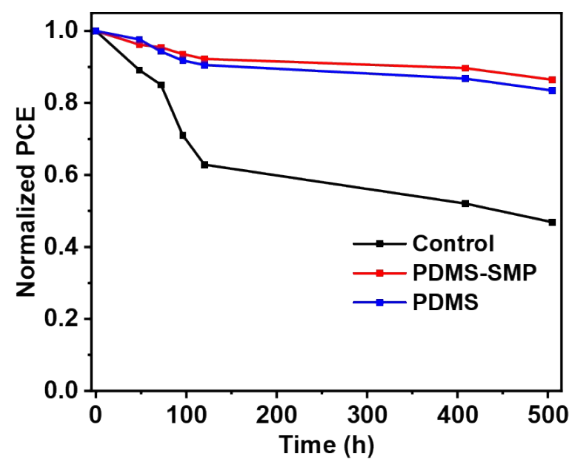

**Fig. S16** The thermal stability of p-i-n PSCs encapsulated with PDMS-SMP, PDMS and control at 65 °C in an N<sub>2</sub>-filled glovebox.

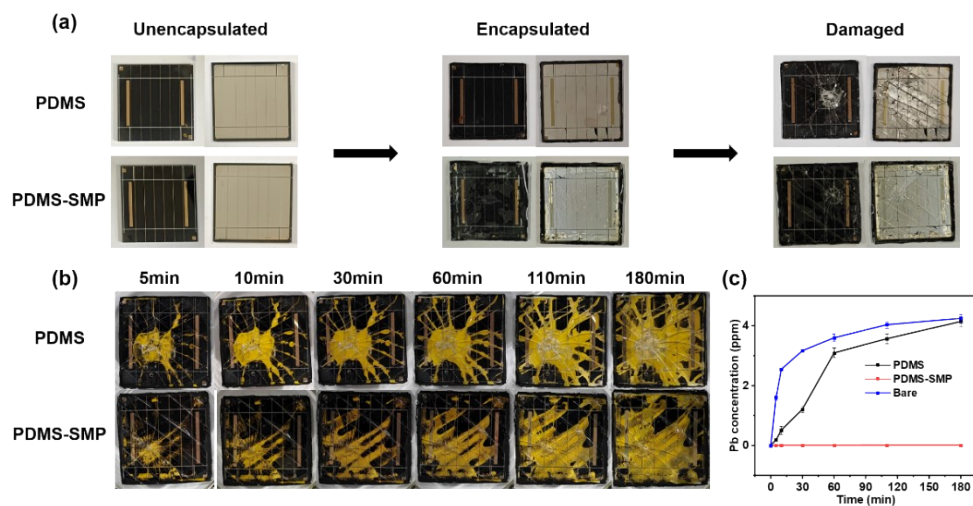

**Fig. S17** (a) Photos of two encapsulation structures in p-i-n PSCs modules before and after encapsulation. (b) Photos of the changes in p-i-n PSC modules with two encapsulation structures immersed in deionized water (pH=7, 25 °C) for 180 minutes. The damaged PSC modules were immersed in 200ml of deionized water. (c) The damaged PSC modules were immersed in 200ml of deionized water (pH=7). Chart of changes in  $Pb^{2+}$  concentration in deionized water.



**Table S1.** Parameters for fitting adsorption kinetics models.

| Kinetic Model       | Parameter                   |        |
|---------------------|-----------------------------|--------|
| Pseudo-first-order  | $q_e$ (mg g <sup>-1</sup> ) | 1.2113 |
|                     | $k_1$                       | 0.2322 |
|                     | $R^2$                       | 0.9778 |
| Pseudo-second-order | $q_e$ (mg g <sup>-1</sup> ) | 1.1745 |
|                     | $k_1$                       | 0.3565 |
|                     | $R^2$                       | 0.9926 |

**Table S2.** Comparison of cost, SQE, fast-degradation between different methods.

| Ref                    | Cost (\$ M <sup>-2</sup> ) | SQE(%)    | Fast-degradation |
|------------------------|----------------------------|-----------|------------------|
| DMDP <sup>5</sup>      | 371                        | 96        | N                |
| EDTMP <sup>5</sup>     | 77                         | 96        | N                |
| DMDP <sup>6</sup>      | 2470                       | 99        | N                |
| Ionogel <sup>7</sup>   | 5.08                       | 99        | N                |
| CFDP <sup>8</sup>      | N                          | 98        | N                |
| AHMA <sup>9</sup>      | N                          | 96        | N                |
| <b>SmP (This work)</b> | <b>5.13</b>                | <b>99</b> | <b>Y</b>         |

**Table S3.** Photovoltaic parameters of representative n-i-p PSCs devices with and without PDMS-SMP encapsulation.

| Samples          | $V_{oc}$ (V) | $J_{sc}$ (mA cm <sup>-2</sup> ) | FF(%) | PCE (%) |
|------------------|--------------|---------------------------------|-------|---------|
| Without, forward | 1.12         | 23.65                           | 79    | 20.9    |
| Without, reverse | 1.12         | 23.67                           | 82    | 21.7    |
| With, forward    | 1.11         | 23.60                           | 79    | 20.7    |
| With, reverse    | 1.12         | 23.60                           | 82    | 21.7    |

**Table S4.** Photovoltaic parameters of representative p-i-n PSCs devices with and without PDMS-SMP encapsulation.

| Samples          | $V_{oc}$ (V) | $J_{sc}$ (mA cm <sup>-2</sup> ) | FF(%) | PCE (%) |
|------------------|--------------|---------------------------------|-------|---------|
| Without, forward | 1.13         | 24.56                           | 75    | 20.8    |
| Without, reverse | 1.13         | 24.14                           | 78    | 21.3    |
| With, forward    | 1.13         | 23.34                           | 78    | 20.6    |
| With, reverse    | 1.14         | 23.01                           | 81    | 21.2    |

## Reference:

1. <https://std.samr.gov.cn/gb/>. Plastics--Determination of tensile properties of films.
2. T. Lu and Q. Chen, *Computational and Theoretical Chemistry*, 2021, **1200**, 113249.
3. Z. Song, C. L. McElvany, A. B. Phillips, I. Celik, P. W. Krantz, S. C. Wattage, G. K. Liyanage, D. Apul and M. J. Heben, *Energy & Environmental Science*, 2017, **10**, 1297-1305.
4. M. W. Brittany L. Smith, Kelsey A. W. Horowitz, Timothy J. Silverman, Jarett Zuboy, Robert M. Margolis, 2021, **NREL/TP-7A40-78173**.
5. X. Li, F. Zhang, H. He, J. J. Berry, K. Zhu and T. Xu, *Nature*, 2020, **578**, 555-558.
6. X. Li, F. Zhang, J. Wang, J. Tong, T. Xu and K. Zhu, *Nature Sustainability*, 2021, **4**, 1038-1041.
7. X. Xiao, M. Wang, S. Chen, Y. Zhang, H. Gu, Y. Deng, G. Yang, C. Fei, B. Chen, Y. Lin, M. D. Dickey and J. Huang, *Sci Adv*, 2021, **7**, eabi8249.
8. T. Wang, J. Yang, Q. Cao, X. Pu, Y. Li, H. Chen, J. Zhao, Y. Zhang, X. Chen and X. Li, *Nat Commun*, 2023, **14**, 1342.
9. Q. Wei, X. Huo, Q. Fu, T. Wang, H. Zhao, Y. Wang, J. Yang, S. Zhan, L. Zhou, S. Wang and P. Yin, *Journal of Materials Chemistry C*, 2022, **10**, 8972-8978.
